# Supplementary material for: Lymphocyte opioid receptors as innovative biomarkers of osteoarthritic pain, for the assessment and risk management of opioid tailored therapy, before hip surgery, to prevent chronic pain and opioid tolerance/addiction development: OpMarkArt (Opioids-Markers-Arthroprosthesis) study protocol for a randomized controlled trial
Source: Springer Nature journal article supplement (doi:10.1186/s13063-017-2363-z), 2017-12-01
Supplement: MOESM2 [file 15319820]

# NUMERIC PAIN RATING SCALE

**“Please indicate the intensity of current, best, and worst pain levels over the past 24 hours, on a scale of 0 (no pain) to 10 (worst pain imaginable)”**

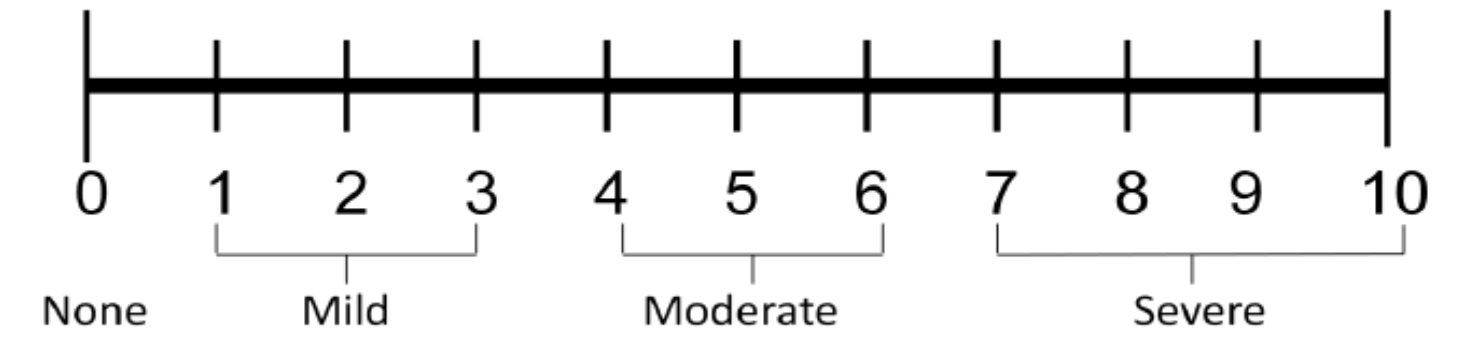

Reference: McCaffery M, Beebe A et al (1989) Pain: Clinical manual for nursing practise.
